# Supplementary material for: Phylogenomic discordance suggests polytomies along the backbone of the large genus Solanum
Source: PubMed Central journal article supplement — Am J Bot. 2022 Apr 18;109(4):580–601. doi: 10.1002/ajb2.1827 (PMC9321964; doi:10.1002/ajb2.1827), 2022-04-18
Supplement: AJB2-109-580-s009.pdf [file AJB2-109-580-s009.pdf]

**Appendix S10. Target-capture alignment statistics.** Loci excluded refer to the number of excluded loci based on excessively long branch lengths, and loci retained is the final number of loci retained for both ML and coalescent analyses. Empty sequences inserted refers to amount of missing data. Min = minimum; Bp = base pairs.

|                                              | <b>TC<br/>Alignment 1<br/>(min4)</b> | <b>TC<br/>Alignment 2<br/>(min10)</b> | <b>TC<br/>Alignment 3<br/>(min20)</b> |
|----------------------------------------------|--------------------------------------|---------------------------------------|---------------------------------------|
| <b>Species</b>                               | 40                                   | 40                                    | 40                                    |
| <b>Minimum number of species per locus</b>   | 4                                    | 10                                    | 20                                    |
| <b>Loci retained for ML analysis</b>         | 348                                  | 337                                   | 310                                   |
| <b>Loci excluded</b>                         | 10                                   | 7                                     | 7                                     |
| <b>Loci retained for Astral analysis</b>     | 338                                  | 330                                   | 303                                   |
| <b>Length of concatenated sequences (bp)</b> | 261,975                              | 257,519                               | 244,272                               |
| <b>Empty sequences inserted</b>              | 3,147                                | 2,781                                 | 2,092                                 |
